# Supplementary material for: Study of risk factors for ascending aortic dilatation in different age groups using cardiac ultrasound indices
Source: Research Square preprint supplement (doi:10.21203/rs.3.rs-7378654/v1), 2025-08-27
Supplement: Supplementary file 1 [file 9911e77977828c926eb3c60b.docx]

**Ethical Approval and Informed Consent:**

This study was approved by the Ethics Committee of Hebei Medical University. Written informed consent was obtained from all participants before inclusion in the study. All research was conducted in accordance with the ethical standards set forth in the Declaration of Helsinki.

**Conflicts of Interest:**

The authors declare no conflicts of interest related to this study.

**Data Availability:**

The datasets generated during and/or analyzed during the current study are available from the corresponding author upon reasonable request.

**Author Contributions:**

Yujia Shen was responsible for data analysis and article writing; Jiabao Guo was responsible for data collection; and Zhenyu Xing was responsible for article review.

**Funding:**

This research was supported by Baoding First Center Hospital
